# Supplementary material for: Size-controllable and stable organometallic halide perovskite quantum dots/polymer films
Source: Royal Society of Chemistry journal article supplement (doi:10.1039/c7tc01562c), 2017-01-01
Supplement: c7tc01562c1.pdf [file c7tc01562c1.pdf]

*Electronic Supplementary Information (ESI) for*

**Size-Controllable and Stable Organometallic Halide Quantum  
Dots/Polymer Film**

*Wonhee Cha,<sup>a</sup> Hae-Jin Kim,<sup>b</sup> Songhee Lee,<sup>c</sup> and Jiwon Kim<sup>c,d\*</sup>*

\*Corresponding author, E-mail: [jiwon.kim@yonsei.ac.kr](mailto:jiwon.kim@yonsei.ac.kr)

*a. Department of Chemistry, Yonsei University, 50 Yonsei-ro, Seodaemun-gu, Seoul 03722, Republic of Korea.*

*b. Department of Mechanical Engineering, University of Houston, 4800 Calhoun Road, Houston, Texas 77204, USA.*

*c. Underwood International College, Yonsei University, 85 Songdogwahak-ro, Yeonsu-gu, Incheon 21983, Republic of Korea.*

*d. School of Integrated Technology, Yonsei University, 85 Songdogwahak-ro, Yeonsu-gu, Incheon 21983, Republic of Korea.*

## EXPERIMENTAL SECTION

### **General Methods**

All chemicals were acquired from commercial sources (except for methylammonium bromide, MABr) and used unless other treatments. Transmission electron microscopy (TEM) images were obtained using a JEOL JEM-2010 at 200 kV. The absorption spectra were recorded using UV/Vis spectrometer SCINCO MEGA 2100 in 350 nm – 900 nm range. X-ray diffraction pattern were obtained using Rigaku SmartLab and Rigaku Ultima IV equipped with a graphite-monochromated Cu K $\alpha$  radiation source (40 kV, 40 mA). The time-correlated single-photon-counting (TCSPC) system was used for measuring the fluorescence decay profiles. [S1] A photoluminescence confocal microscope Carl Zeiss LSM 700 was used to structural analysis.

### **Materials**

#### **Preparation of Methylammonium bromide (CH<sub>3</sub>NH<sub>3</sub>Br, MABr)**

MABr was synthesized according to reported method. [S2] Methylamine (30 mL, 40 wt% in methanol, TCI) was reacted with hydrobromic acid (50 mL, 48 wt% in water, Aldrich) at 0 °C for 2h. CH<sub>3</sub>NH<sub>3</sub>Br was recovered by rotary evaporation at 50 °C for 1h. The product was washed with diethyl ether and dried in vacuum oven at 60 °C for 24h.

#### **Synthesis of gold nanoparticles (AuNPs)**

AuNPs were synthesized as previously reported. [S3]

#### **Purification of AuNPs**

AuNP solution and methanol (4 times in volume) was mixed for 1 hour. The upper part of solution was dumped, then pure toluene with the same volume of dumped solution was added. Repeat the same processes and at the final step, n-hexane was added instead of toluene.

#### **Preparation of AuNP/PDMS film**

1.0 g of silicone elastomer base (PDMS pre-polymer) and 0.4 mL of prepurified AuNP solution (concentration:  $8.05 \times 10^{14}$ /mL) were mixed. 0.2 mL of n-hexane (extra pure grade) was added for preventing further aggregation. 0.1 g of silicone elastomer curing agent (cross-linker) was added to the mixture. The mixture was degassed in dynamic vacuum for several hours. The final mixture was heated at 65 °C for overnight in the oven.

#### **Preparation porous PDMS template (etching gold nanoparticles)**

AuNPs within AuNP/PDMS film could be removed by using aqua regia (mixture of nitric acid and hydrochloric acid) as etching solvent. For effective etching process, AuNP/PDMS film was swelled in THF solution before dipping into the aqua regia. After etching process, the reddish colored AuNP/PDMS film became transparent porous PDMS.

#### **Growth of MAPbX<sub>3</sub> in porous PDMS template**

The porous PDMS template was swelled in THF solution. Then, the template was dipped into 1 M precursor solution (Methylammonium halide and lead halide in anhydrous DMF or mixture of DMF and DMSO with 1:1 ratio) for several hours. Then, the template was dried at 65 °C in vacuum oven for several hours. Transparent porous template became colored MAPbX<sub>3</sub> QDs/PDMS film. Bulk materials formed on the film surface was washed by clean DMF solution and then the MAPbX<sub>3</sub> QDs/PDMS film was dried at 65 °C in vacuum oven for several hours.

### MAPbBr<sub>3</sub> QDs Synthesized by Using Ligand-Assisted Re-Precipitation (LARP) Method

Three different sized MAPbBr<sub>3</sub> QDs were synthesized by LARP method at 20 °C, 30 °C, and 40 °C. As synthesis temperature increased, the larger MAPbBr<sub>3</sub> QDs were synthesized. Absorption and photoluminescence peak of MAPbBr<sub>3</sub> QDs were blue-shifted as the size decreased owing to the quantum confinement effect.

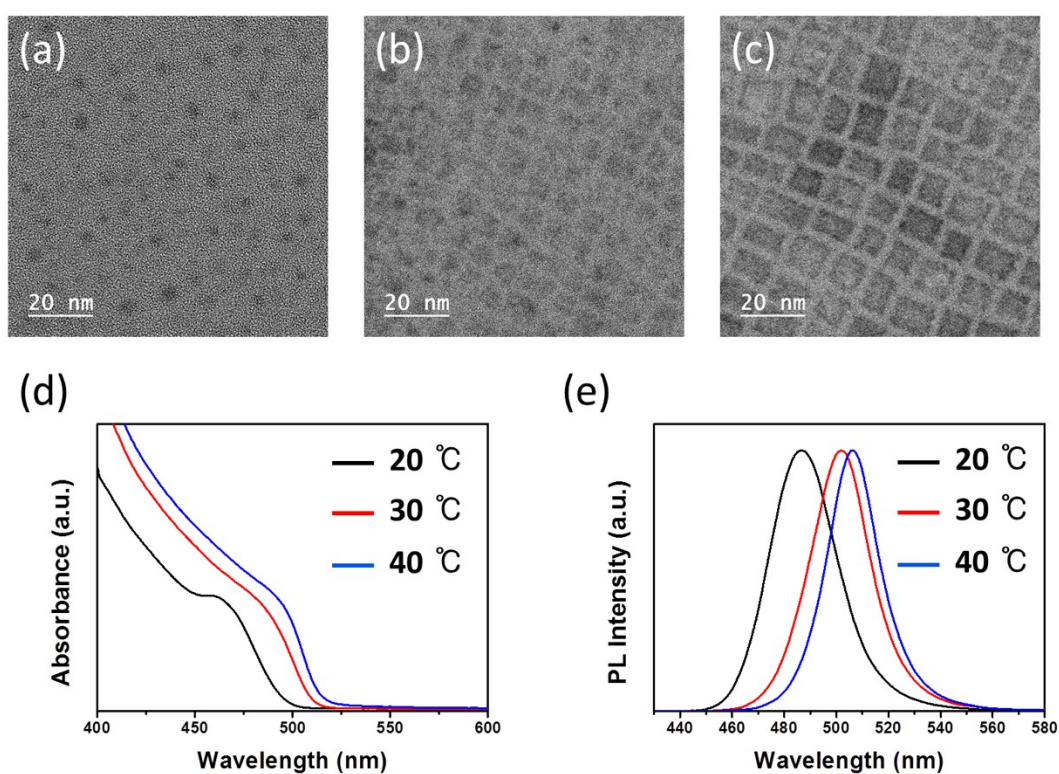

**Figure S1.** MAPbBr<sub>3</sub> QDs synthesized by using LARP strategy. (a)-(c) TEM image of MAPbBr<sub>3</sub> QDs synthesized by using LARP strategy at 20 °C, 30 °C, and 40 °C, respectively. [S2] (d)-(e) Absorption and PL spectra of MAPbBr<sub>3</sub> QDs.

### Photoluminescence of Three Different Sizes of MAPbBr<sub>3</sub> QDs/PDMS Films

Three different sized AuNPs whose diameter was 5.6 nm, 7.8 nm, and 9.8 nm were used to prepare MAPbBr<sub>3</sub> QDs/PDMS films. Under UV lamp excitation at 365 nm, these films exhibited green emission. When the diameter of AuNPs was 9.8 nm, it showed the strongest photoluminescence.

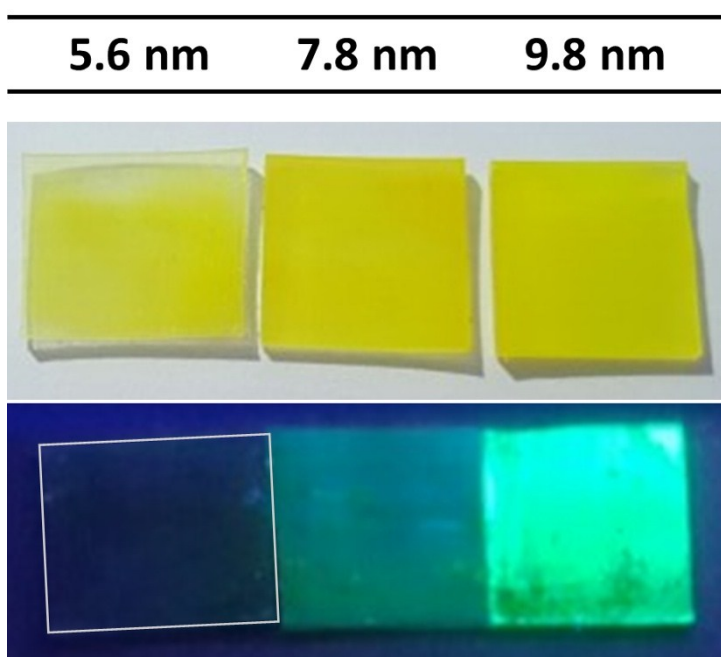

**Figure S2.** Images of size-controlled MAPbBr<sub>3</sub> QDs/PDMS film. Photograph of three different sizes MAPbBr<sub>3</sub> QDs/PDMS film (top) and under UV lamp excitation at 365 nm (bottom).

### Fluorescence Decay of MAPbBr<sub>3</sub> QDs/PDMS Film

The time-correlated single-photon-counting (TCSPC) system was used for measuring the fluorescence decay profiles. [S1] We can assign the fast time component ( $\tau_1$ ) as a decay related to recombination of biexcitons and the slow time component ( $\tau_2$ ) as a decay related to recombination of single exciton. As MAPbBr<sub>3</sub> QD size increased, the ratio of  $\tau_2$  amplitude to  $\tau_1$  amplitude ( $A_2/A_1$ ) increased from 0.14 to 0.27, and 0.43 for D<sub>1</sub>, D<sub>2</sub>, and D<sub>3</sub>, respectively.

|               | D <sub>1</sub> | D <sub>2</sub> | D <sub>3</sub> |
|---------------|----------------|----------------|----------------|
| $\tau_1$ (ns) | 0.6            | 0.9            | 0.6            |
| $A_1$ (%)     | 88             | 79             | 70             |
| $\tau_2$ (ns) | 10             | 12             | 10             |
| $A_2$ (%)     | 12             | 21             | 30             |
| $A_2/A_1$     | 0.14           | 0.27           | 0.43           |

**Table S1. Photoluminescence lifetime of different sizes of MAPbBr<sub>3</sub> QDs/PDMS films.** Decay lifetimes ( $\tau_1$  and  $\tau_2$ ) and  $A_2/A_1$  of different sized MAPbBr<sub>3</sub> QDs within the MAPbBr<sub>3</sub> QDs/PDMS film.

### Fluorescence Decay of MAPbBr<sub>3</sub> QDs/PDMS Film at weak photo-excitation (<20 μJ/cm<sup>2</sup>)

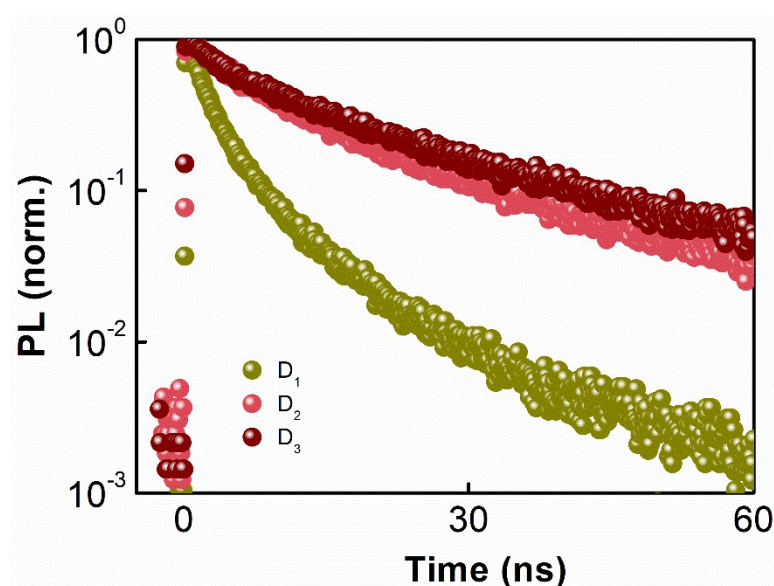

**Figure S3. Fluorescence Decay of MAPbBr<sub>3</sub> QDs/PDMS Film at weak photo-excitation.** Time-correlated single photon counting (TCSPC) measurements of three different sizes of MAPbBr<sub>3</sub> QDs in PDMS films at weak photo-excitation (<20 μJ/cm<sup>2</sup>).

|                     | D <sub>1</sub> | D <sub>2</sub> | D <sub>3</sub> |
|---------------------|----------------|----------------|----------------|
| τ <sub>1</sub> (ns) | 2.3            | 5.3            | 3.4            |
| A <sub>1</sub> (%)  | 81             | 50             | 30             |
| τ <sub>2</sub> (ns) | 9.8            | 19.3           | 18.4           |
| A <sub>2</sub> (%)  | 19             | 50             | 70             |

**Table S2. Photoluminescence lifetime of different sizes of MAPbBr<sub>3</sub> QDs in PDMS films.**

Decay lifetimes (τ<sub>1</sub> and τ<sub>2</sub>) and amplitude (A<sub>1</sub> and A<sub>2</sub>) of different sized MAPbBr<sub>3</sub> QDs within the MAPbBr<sub>3</sub> QDs/PDMS film with weak photo-excitations.

### References

- [S1] D. Shimizu, J. Oh, H. Uoyama, H. Watanabe, K. Tagawa, H. Uno, D. Kim, *Phys. Chem. Chem. Phys.* 2013, **15**, 10612-10615.
- [S2] H. Huang, A. S. Susha, S. V. Kershaw, T. F. Hung and A. L. Rogach, *Adv. Sci.* 2015, **2**, 1500194.
- [S3] R. Klajn, K. J. M. Bishop, M. Fialkowski, M. Paszewski, C. J. Campbell, and T. P. Gray, *Science* 2007, **316**, 261-264
